# Supplementary material for: Interactive Effects of Wide-Spectrum Monochromatic Lights on Phytochemical Production, Antioxidant and Biological Activities of Solanum xanthocarpum Callus Cultures
Source: PubMed Central journal article supplement (PMC7248882; doi:10.3390/molecules25092201), 2020-05-08
Supplement: molecules-25-02201-s001.pdf [file molecules-25-02201-s001.pdf]

**Table S1.** Actual values for PCC (Pearson Correlation Coefficient) showing the relation between the main phytochemicals (TPC, TFC, caffeic acid, methyl-caffeate, scopoletin and esculetin) from extracts of *in vitro* culture of *S. xanthocarpum* subjected to different light treatments and the mentioned biological activities (antioxidant, anti-diabetes, anti-aging and anti-inflammatory).

|                       | TPC           | TFC            | caffeic acid   | methyl-caffeate | scopoletin    | esculetin      |
|-----------------------|---------------|----------------|----------------|-----------------|---------------|----------------|
| DPPH                  | 0.620         | -0.169         | 0.162          | 0.039           | 0.653         | 0.682          |
| ABTS                  | 0.925         | <b>0.208**</b> | <b>0.829*</b>  | <b>0.770*</b>   | 0.587         | 0.639          |
| FRAP                  | 0.885         | <b>0.096**</b> | <b>0.928**</b> | <b>0.890**</b>  | 0.373         | 0.431          |
| $\alpha$ -glucosidase | 0.890         | <b>0.171**</b> | <b>0.909**</b> | <b>0.855*</b>   | 0.411         | 0.462          |
| $\alpha$ -amylase     | 0.917         | <b>0.265**</b> | <b>0.840*</b>  | <b>0.812*</b>   | 0.599         | 0.638          |
| COX-1                 | 0.845         | <b>0.195*</b>  | 0.531          | 0.553           | <b>0.859*</b> | <b>0.878**</b> |
| COX-2                 | 0.586         | 0.303          | -0.003         | 0.043           | <b>0.790*</b> | 0.503          |
| sPLA2                 | <b>0.623*</b> | 0.739          | 0.614          | 0.595           | 0.532         | 0.504          |
| 15LOX                 | <b>0.520*</b> | 0.777          | 0.210          | 0.144           | 0.486         | 0.195          |
| Verp. AGEs            | 0.927         | <b>0.150**</b> | <b>0.877**</b> | <b>0.826*</b>   | 0.520         | 0.581          |
| Pent. AGEs            | 0.853         | <b>0.152*</b>  | <b>0.825*</b>  | 0.728           | 0.520         | 0.667          |
| collagenase           | 0.481         | 0.000          | 0.274          | 0.266           | 0.675         | <b>0.854*</b>  |
| tyrosinase            | 0.584         | 0.075          | <b>0.903**</b> | <b>0.963***</b> | 0.175         | 0.371          |
| elastase              | -0.355        | 0.215          | -0.719         | -0.698          | 0.143         | -0.096         |
| hyalunidase           | 0.204         | 0.445          | 0.009          | 0.133           | <b>0.758*</b> | <b>0.835*</b>  |

TPC Total Phenolic Content; TFC Total Flavonoid Content; DPPH 2,2-Diphenyl-1-picrylhydrazyl radical scavenging activity ; ABTS 2,2-Azinobis (3-ethylbenzthiazoline-6-sulphonic acid) antioxidant activity; FRAP Ferric reducing antioxidant power; COX-1 cyclooxygenase-1 inhibition; COX-2 cyclooxygenase-2 inhibition; sPLA2 phospholipase A2 inhibition; 15-LOX lipoxygenase inhibition; Verp. AGE vesperlysine-like advanced glycation end products inhibition; Pent. AGE pentosidine-like advanced glycation end products inhibition.

Colors referred to the following PCC values:

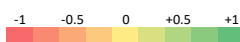

\*p < 0.05, \*\*p < 0.01, \*\*\* p < 0.001.
